# Supplementary material
Source: Copernicus journal article supplement (doi:10.5194/acp-26-9413-2026)
Supplement: Supplementary file 1 [file acp-26-9413-2026-supplement.pdf]

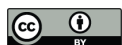

*Supplement of*

## **Temperature and radiative responses to anthropogenic aerosols over the Mediterranean Basin based on CMIP6 Earth system models**

**Alkiviadis Kalisoras et al.**

*Correspondence to:* Alkiviadis Kalisoras (kalisort@geo.auth.gr)

The copyright of individual parts of the supplement might differ from the article licence.

**Table S1.** Annual mean values (in  $W\ m^{-2}$ ) of shortwave (SW) and longwave (LW) radiative flux change ( $\Delta F_{coupled}$ ) at the top-of-atmosphere (TOA) and at the surface (SURF) over the Mediterranean for the periods 1970–1979, 2005–2014 and their difference (2005–2014 minus 1970–1979).  $\Delta F_{coupled}$  was calculated from the difference *historical* minus *hist-piAer*. Values are presented for each model, along with the multi-model ensemble mean and inter-model variability (1 standard deviation; SD).

| Model                 | 1970–1979 |           |            |            | 2005–2014 |           |            |            | Diff.     |           |            |            |
|-----------------------|-----------|-----------|------------|------------|-----------|-----------|------------|------------|-----------|-----------|------------|------------|
|                       | SW<br>TOA | LW<br>TOA | SW<br>SURF | LW<br>SURF | SW<br>TOA | LW<br>TOA | SW<br>SURF | LW<br>SURF | SW<br>TOA | LW<br>TOA | SW<br>SURF | LW<br>SURF |
| BCC-ESM1              | -7.98     | 5.26      | -8.01      | 1.67       | -5.55     | 5.15      | -5.87      | 1.14       | 2.43      | -0.11     | 2.14       | -0.54      |
| CNRM-ESM2-1           | -4.18     | 2.07      | -5.02      | 1.55       | -2.60     | 1.39      | -3.61      | 1.33       | 1.59      | -0.68     | 1.41       | -0.22      |
| EC-Earth3-<br>AerChem | -8.60     | 8.00      | -9.21      | 2.83       | -5.44     | 6.21      | -7.78      | 3.19       | 3.16      | -1.80     | 1.43       | 0.36       |
| GFDL-ESM4             | -6.42     | 3.40      | -8.06      | 2.78       | -3.93     | 2.54      | -6.06      | 1.82       | 2.49      | -0.87     | 2.01       | -0.96      |
| MPI-ESM-1-2-<br>HAM   | -7.77     | 3.00      | -8.16      | 2.37       | -5.40     | 3.41      | -6.57      | 2.56       | 2.37      | 0.41      | 1.59       | 0.19       |
| MRI-ESM2-0            | -9.73     | 3.56      | -9.86      | 1.73       | -3.86     | 1.93      | -4.14      | -0.50      | 5.87      | -1.63     | 5.72       | -2.23      |
| NorESM2-LM            | -5.25     | 4.07      | -5.48      | 2.06       | -2.88     | 2.31      | -3.67      | 1.01       | 2.37      | -1.76     | 1.81       | -1.06      |
| UKESM1-0-LL           | -7.84     | 6.47      | -8.31      | 3.20       | -4.71     | 5.07      | -6.48      | 3.07       | 3.12      | -1.39     | 1.83       | -0.14      |
| Ensemble (Mean)       | -7.22     | 4.48      | -7.76      | 2.28       | -4.30     | 3.50      | -5.52      | 1.70       | 2.93      | -0.98     | 2.24       | -0.57      |
| Ensemble (SD)         | 1.70      | 1.84      | 1.58       | 0.58       | 1.09      | 1.65      | 1.44       | 1.15       | 1.20      | 0.76      | 1.34       | 0.78       |

**Table S2.** As in Table S1, but for the boreal winter (DJF).

| Model                 | 1970–1979 |           |            |            | 2005–2014 |           |            |            | Diff.     |           |            |            |
|-----------------------|-----------|-----------|------------|------------|-----------|-----------|------------|------------|-----------|-----------|------------|------------|
|                       | SW<br>TOA | LW<br>TOA | SW<br>SURF | LW<br>SURF | SW<br>TOA | LW<br>TOA | SW<br>SURF | LW<br>SURF | SW<br>TOA | LW<br>TOA | SW<br>SURF | LW<br>SURF |
| BCC-ESM1              | -3.63     | 2.34      | -3.48      | 1.08       | -3.51     | 4.12      | -3.51      | 1.92       | 0.12      | 1.78      | -0.03      | 0.84       |
| CNRM-ESM2-1           | -2.49     | 1.65      | -2.83      | 1.16       | -1.38     | 0.52      | -1.77      | 0.20       | 1.11      | -1.13     | 1.06       | -0.96      |
| EC-Earth3-<br>AerChem | -7.78     | 5.87      | -8.26      | 2.87       | -3.05     | 1.28      | -3.96      | 1.78       | 4.73      | -4.60     | 4.30       | -1.09      |
| GFDL-ESM4             | -3.99     | 2.79      | -5.04      | 3.43       | -1.21     | 0.57      | -2.53      | 1.50       | 2.78      | -2.22     | 2.51       | -1.92      |
| MPI-ESM-1-2-<br>HAM   | -7.62     | 2.60      | -8.17      | 4.04       | -2.61     | -1.23     | -3.05      | 0.55       | 5.01      | -3.83     | 5.12       | -3.49      |
| MRI-ESM2-0            | -6.91     | 3.02      | -6.72      | 3.40       | -2.82     | 2.17      | -3.04      | 1.39       | 4.09      | -0.86     | 3.68       | -2.02      |
| NorESM2-LM            | -3.42     | 2.55      | -3.68      | 2.25       | -3.81     | 2.79      | -4.23      | 1.77       | -0.39     | 0.24      | -0.55      | -0.47      |
| UKESM1-0-LL           | -4.88     | 4.64      | -5.12      | 3.32       | -4.32     | 5.01      | -5.10      | 3.90       | 0.56      | 0.36      | 0.02       | 0.58       |
| Ensemble (Mean)       | -5.09     | 3.18      | -5.41      | 2.69       | -2.84     | 1.90      | -3.40      | 1.63       | 2.25      | -1.28     | 2.01       | -1.07      |
| Ensemble (SD)         | 1.93      | 1.29      | 1.97       | 1.03       | 1.03      | 1.91      | 0.97       | 1.03       | 2.03      | 2.03      | 2.05       | 1.33       |

**Table S3.** As in Table S1, but for the boreal summer (JJA).

| Model                 | 1970–1979 |           |            |            | 2005–2014 |           |            |            | Diff.     |           |            |            |
|-----------------------|-----------|-----------|------------|------------|-----------|-----------|------------|------------|-----------|-----------|------------|------------|
|                       | SW<br>TOA | LW<br>TOA | SW<br>SURF | LW<br>SURF | SW<br>TOA | LW<br>TOA | SW<br>SURF | LW<br>SURF | SW<br>TOA | LW<br>TOA | SW<br>SURF | LW<br>SURF |
| BCC-ESM1              | -11.72    | 9.21      | -12.18     | 2.65       | -5.84     | 6.28      | -6.42      | 1.14       | 5.89      | -2.94     | 5.76       | -1.52      |
| CNRM-ESM2-1           | -7.04     | 3.84      | -8.79      | 2.87       | -3.56     | 2.01      | -5.32      | 2.11       | 3.48      | -1.83     | 3.47       | -0.76      |
| EC-Earth3-<br>AerChem | -9.85     | 12.09     | -10.72     | 2.66       | -7.27     | 11.75     | -11.57     | 5.25       | 2.58      | -0.34     | -0.85      | 2.59       |
| GFDL-ESM4             | -8.98     | 5.66      | -11.66     | 3.30       | -5.19     | 4.19      | -7.99      | 1.39       | 3.79      | -1.47     | 3.67       | -1.91      |
| MPI-ESM-1-2-<br>HAM   | -8.24     | 6.12      | -8.75      | 2.29       | -4.79     | 5.30      | -6.59      | 2.50       | 3.45      | -0.82     | 2.16       | 0.21       |
| MRI-ESM2-0            | -11.75    | 5.36      | -12.36     | 0.52       | -5.12     | 2.85      | -5.33      | -1.48      | 6.63      | -2.51     | 7.03       | -2.00      |
| NorESM2-LM            | -5.67     | 5.33      | -6.15      | 2.45       | -2.41     | 2.46      | -3.64      | 0.93       | 3.26      | -2.87     | 2.51       | -1.53      |
| UKESM1-0-LL           | -9.21     | 9.07      | -10.09     | 3.18       | -4.19     | 5.66      | -6.82      | 2.78       | 5.02      | -3.41     | 3.26       | -0.40      |
| Ensemble (Mean)       | -9.06     | 7.09      | -10.09     | 2.49       | -4.80     | 5.06      | -6.71      | 1.83       | 4.26      | -2.03     | 3.38       | -0.66      |
| Ensemble (SD)         | 1.98      | 2.58      | 1.98       | 0.81       | 1.37      | 2.92      | 2.20       | 1.79       | 1.33      | 1.02      | 2.22       | 1.43       |

### Changes in AOD over MED (1850–2014)

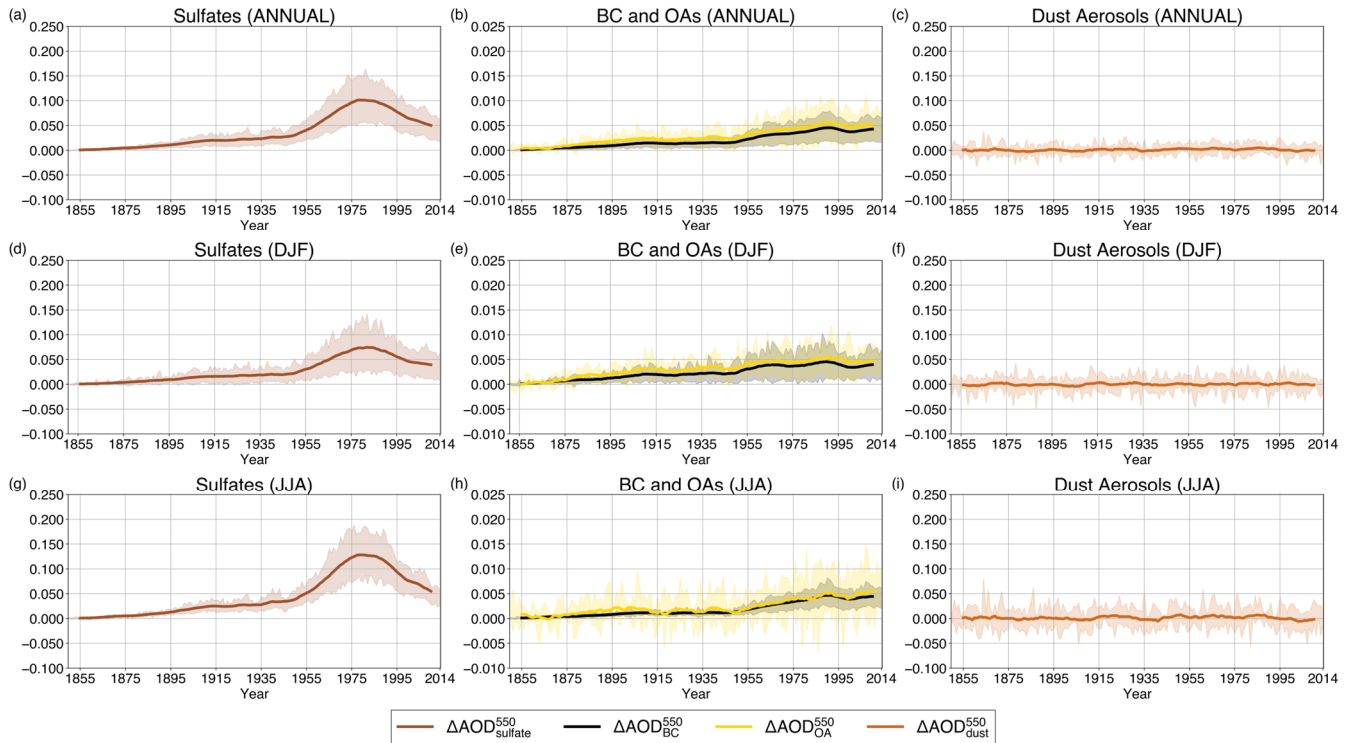

**Figure S1.** Timeseries of the AA-induced evolution of the aerosol optical depth ( $\Delta AOD$ ) of sulfate aerosols (left column) black carbon (BC) and organic aerosols (OA; middle column), and dust aerosols (right column) over the Mediterranean region ( $10^{\circ}\text{W}$ – $40^{\circ}\text{E}$ ,  $30^{\circ}\text{N}$ – $45^{\circ}\text{N}$ ) for the historical period (1850–2014) on an annual scale (top row) and in boreal winter (DJF; middle row) and summer (JJA; bottom row). Changes in AOD were calculated from the difference *historical* minus *hist-piAer*. The lines represent 10-year moving averages, while shading expresses the inter-model variability (one standard deviation).

ERF<sub>SURF</sub> Change (histSST – histSST-piAer)

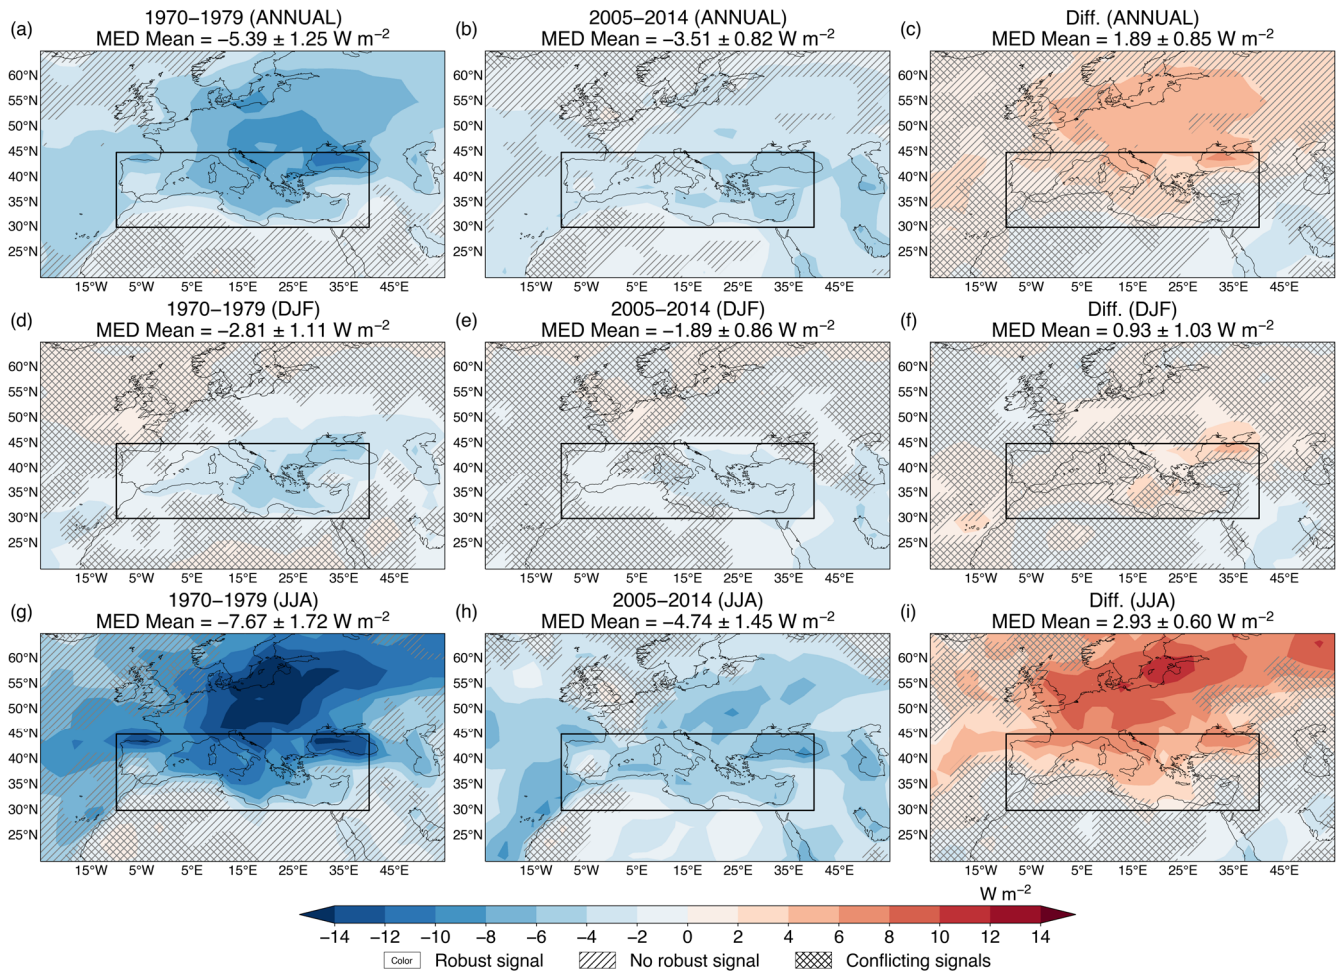

**Figure S2.** ERF<sub>SURF</sub> due to anthropogenic aerosols (calculated from the difference *histSST* minus *histSST-piAer*) over the Mediterranean (in  $W m^{-2}$ ). Spatial patterns are presented for the periods 1970–1979 (left column), 2005–2014 (middle column) and their difference (2005–2014 minus 1970–1979; right column) on an annual scale (top row) and in boreal winter (DJF; middle row) and summer (JJA; bottom row). The multi-model ensemble means over the Mediterranean region (shown as a box) are shown along with the inter-model variability (one standard deviation) at the top of each panel. Colored areas without markings indicate robust changes, while hatched (/) and cross-hatched (X) areas indicate non-robust changes and conflicting signals, respectively.

$\Delta F_{\text{SURF}}^{\text{coupled}}$  Change (historical – hist-piAer)

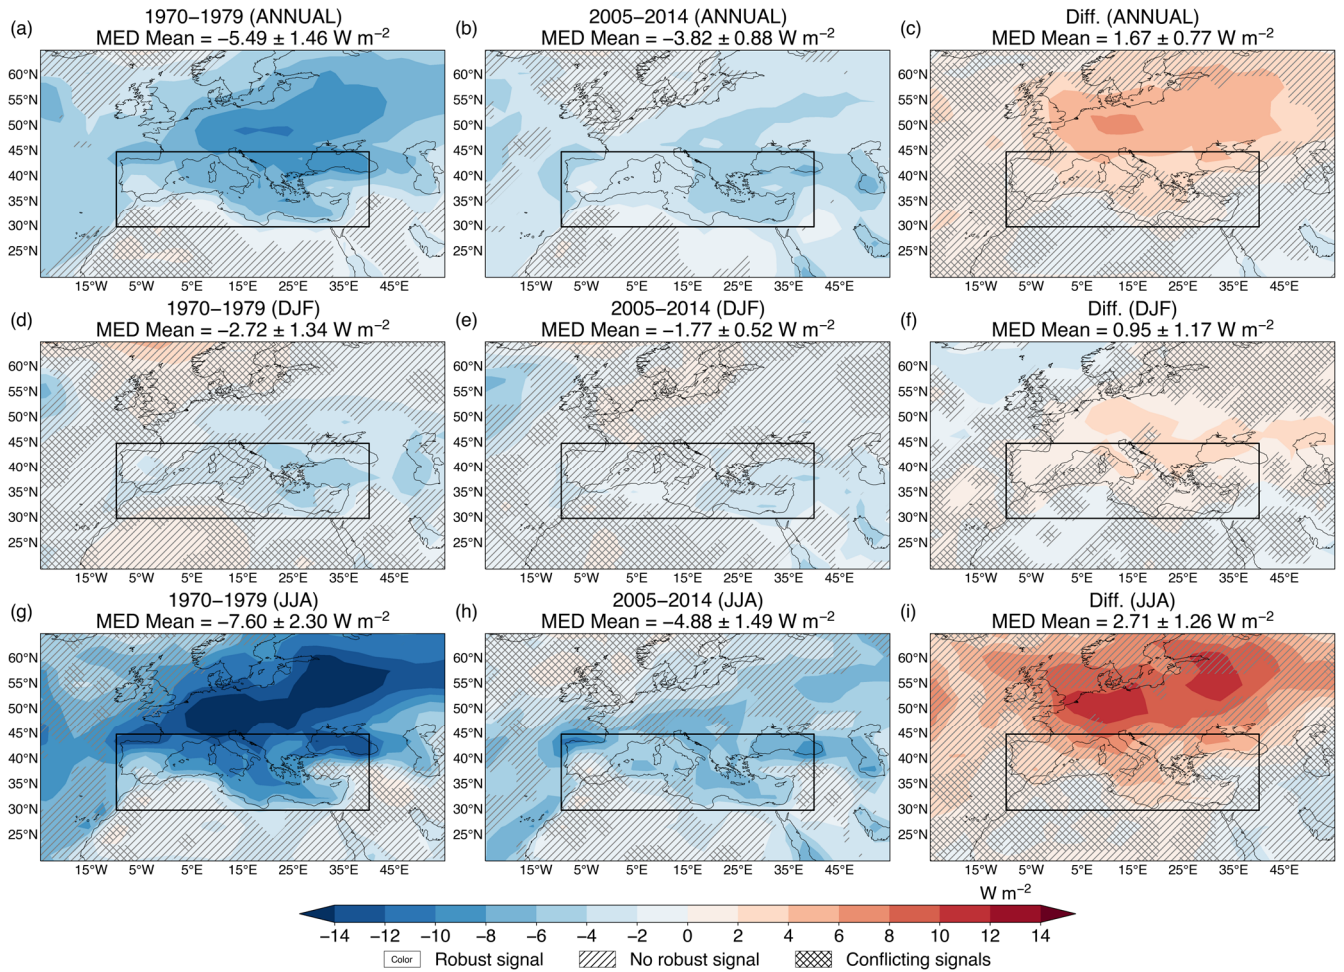

**Figure S3.**  $\Delta F_{\text{coupled}}$  at the surface due to anthropogenic aerosols over the Mediterranean (calculated from the difference *historical* minus *hist-piAer*). Spatial patterns are presented for the periods 1970–1979 (left column), 2005–2014 (middle column) and their difference (2005–2014 minus 1970–1979; right column) on an annual scale (top row) and in boreal winter (DJF; middle row) and summer (JJA; bottom row). The multi-model ensemble means over the Mediterranean region (shown as a box) are shown along with the inter-model variability (one standard deviation) at the top of each panel. Colored areas without markings indicate robust changes, while hatched (/) and cross-hatched (X) areas indicate non-robust changes and conflicting signals, respectively.

## Changes in Sea-Level Pressure and Surface Winds (historical – hist-piAer)

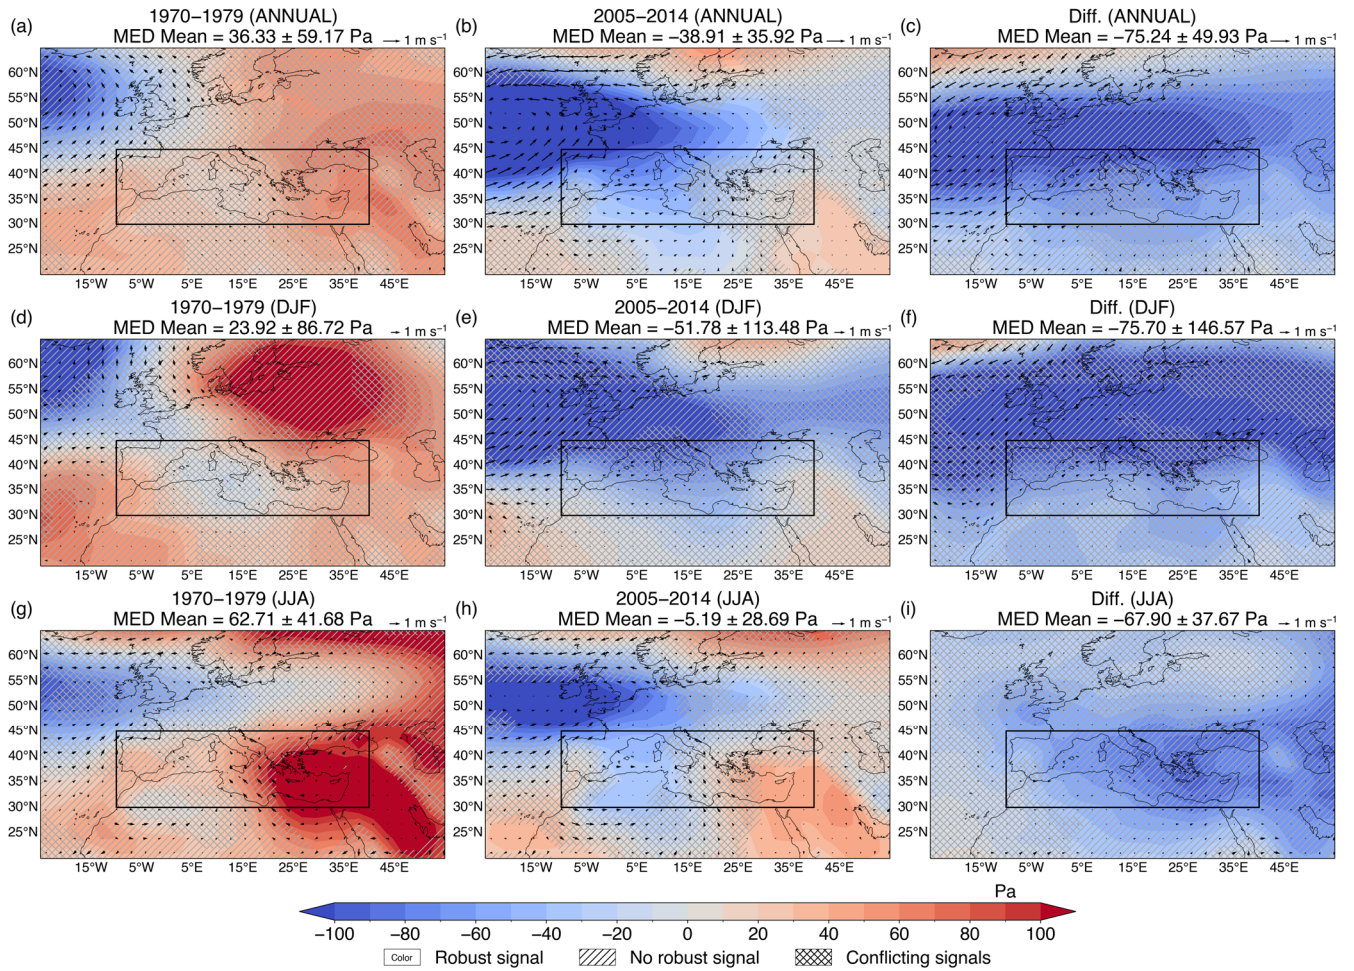

**Figure S4.** Changes in sea-level pressure and near-surface winds due to anthropogenic aerosols over the Mediterranean (calculated from the difference *historical* minus *hist-piAer*). Spatial patterns are presented for the periods 1970–1979 (left column), 2005–2014 (middle column) and their difference (2005–2014 minus 1970–1979; right column) on an annual scale (top row) and in boreal winter (DJF; middle row) and summer (JJA; bottom row). The multi-model ensemble means over the Mediterranean region (shown as a box) are shown along with the inter-model variability (one standard deviation) at the top of each panel. Colored areas without markings indicate robust changes, while hatched (/) and cross-hatched (X) areas indicate non-robust changes and conflicting signals, respectively.
